# Supplementary material for: Requestioning the Indonesia Government's Public Policy Response to the COVID-19 Pandemic: Black Box Analysis for the Period of January–July 2020
Source: Frontiers journal article supplement (doi:10.3389/fpubh.2021.612994), 2021-05-10
Supplement: Data_Sheet_1.PDF [file Data_Sheet_1.PDF]

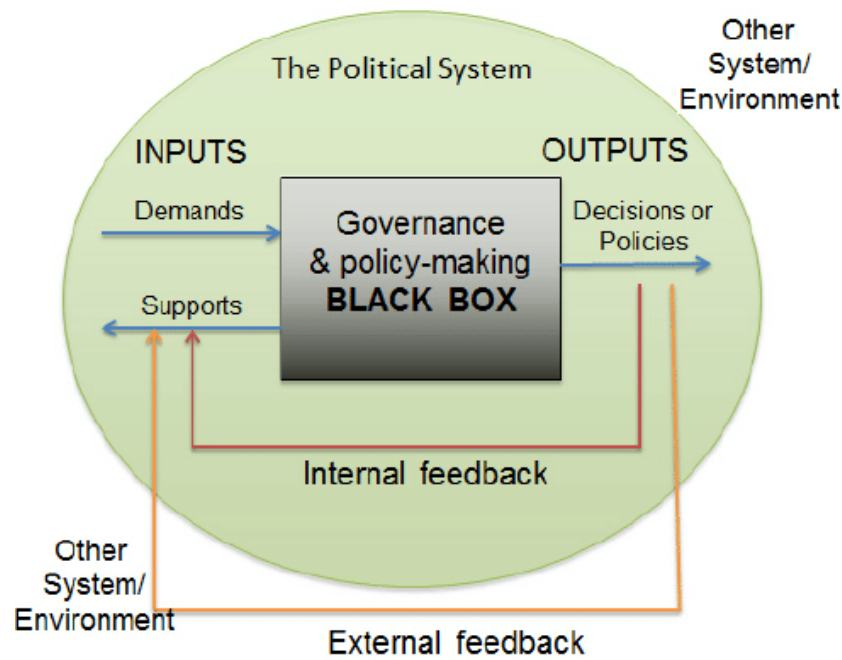

**Figure 1: Analysis of Political System**  
 (David Easton, *A Systems Analysis of Political Life*, 1965)  
 Source: researchgate.com

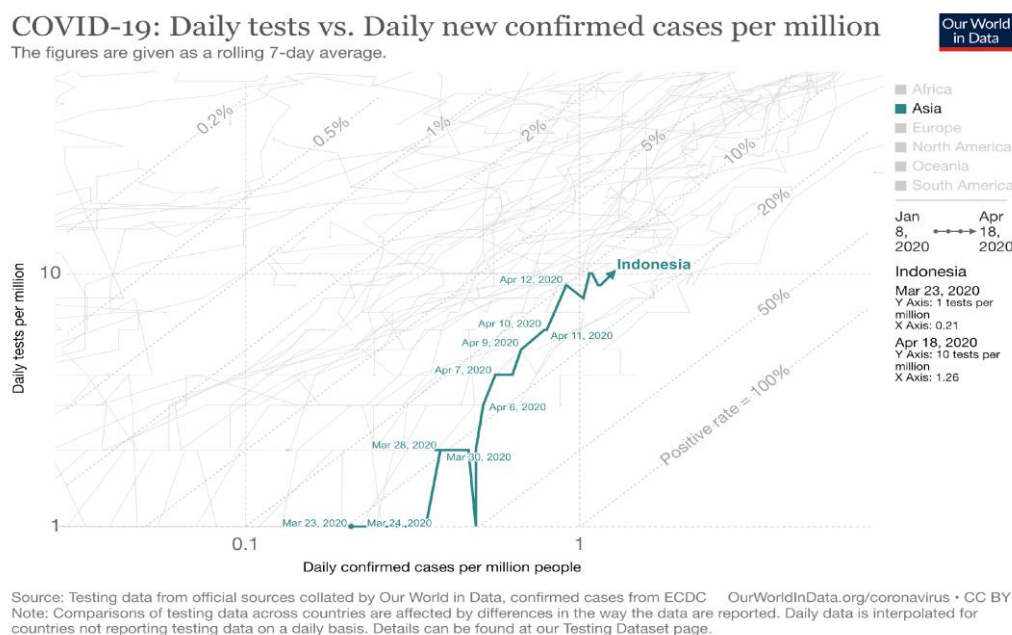

**Figure 2: COVID-19 Daily Tests vs Daily New Confirmed Cases**  
 (Source: Our World in Data, Oxford University 2020)

*Figure, Number of Daily Checks for COVID-19 in Indonesia*
